# Supplementary material for: Determination of Caffeoylquinic Acids Content by UHPLC in Scolymus hispanicus Extracts Obtained through Ultrasound-Assisted Extraction
Source: MDPI journal article supplement (doi:10.3390/plants12122340), 2023-06-16
Supplement: s1 [file s1]

# Determination of Caffeoylquinic Acids Content by UHPLC in *Scolymus hispanicus* Extracts Obtained through Ultrasound Assisted Extraction

Antonio Ruano-González <sup>1</sup>, Ana A. Pinto <sup>1,2,\*</sup>, Nuria Chinchilla <sup>3</sup>, Miguel Palma <sup>2</sup>, Gerardo F. Barbero <sup>2</sup>, Ceferino Carrera <sup>2</sup> and Mercedes Vázquez-Espinosa <sup>2</sup>

## Supplementary Material

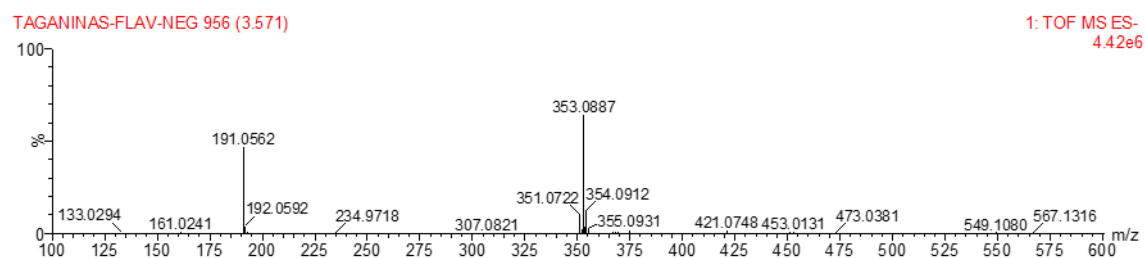

**Figure S1.** Mass spectrum obtained for 5-CQA by UHPLC-Q-ToF-MS.

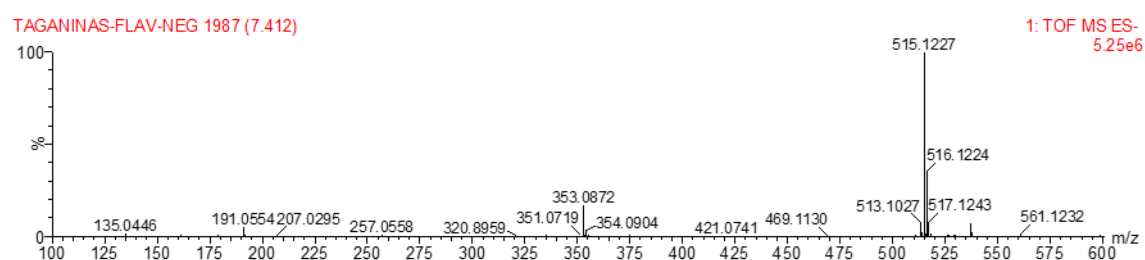

**Figure S2.** Mass spectrum obtained for 3,5-diCQA by UHPLC-Q-ToF-MS.

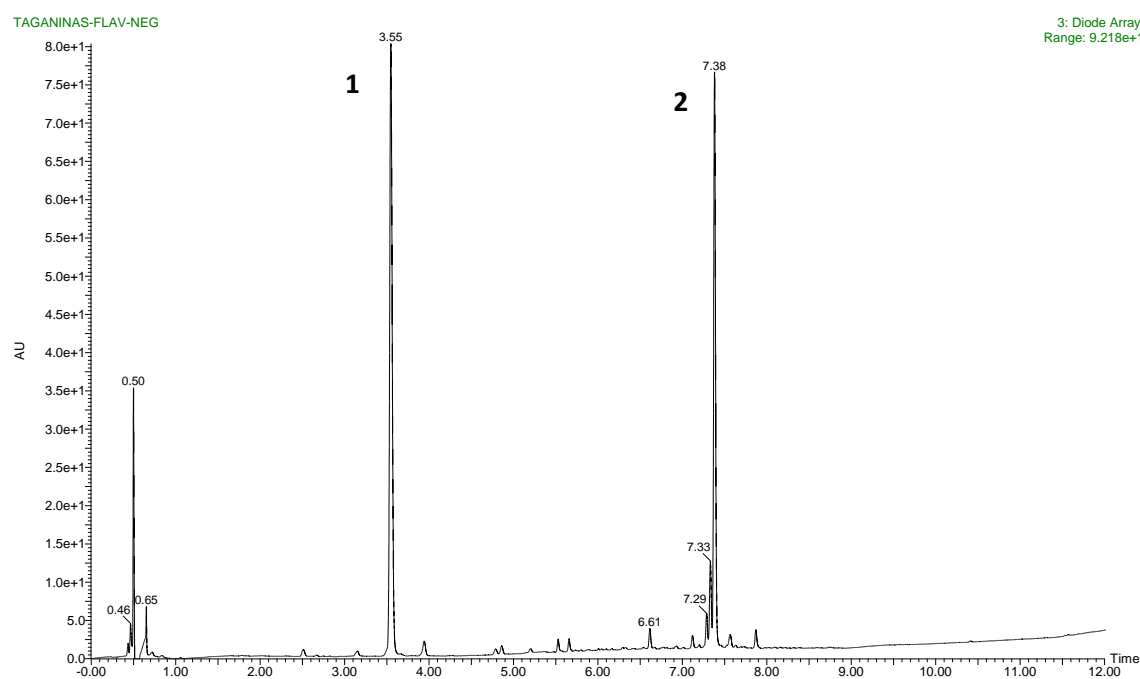

**Figure S3.** Chromatogram obtained by UHPLC-DAD from extracts of *Scolymus hispanicus* ( $\lambda = 320$  nm); (1: 5-CQA; 2: 3,5-diCQA).
